# The Listening Zone of Human Electrocorticographic Field Potential Recordings

Meredith J McCarty<sup>1,2</sup>, Oscar Woolnough<sup>1,2</sup>, John C. Mosher<sup>2</sup>, John Seymour<sup>1,2</sup>, Nitin Tandon<sup>1,2,3\*</sup>

<sup>1</sup> Vivian L. Smith Department of Neurosurgery, McGovern Medical School at UT Health Houston, Houston, TX, 77030, United States of America

<sup>2</sup> Texas Institute for Restorative Neurotechnologies, University of Texas Health Science Center at Houston, Houston, TX, 77030, United States of America

<sup>3</sup> Memorial Hermann Hospital, Texas Medical Center, Houston, TX, 77030, United States of America

\* Correspondence: [nitin.tandon@uth.tmc.edu](mailto:nitin.tandon@uth.tmc.edu)

## 1 **Abstract**

2 Intracranial electroencephalographic (icEEG) recordings provide invaluable insights  
3 into neural dynamics in humans due to their unmatched spatiotemporal resolution.  
4 Yet, such recordings reflect the combined activity of multiple underlying generators,  
5 confounding the ability to resolve spatially distinct neural sources. To empirically  
6 quantify the listening zone of icEEG recordings, we computed the correlations  
7 between signals as a function of distance (expressed as full width at half maximum;  
8 FWHM) between 8,752 recording sites in 71 patients implanted with either subdural  
9 electrodes (SDE), stereo-encephalography electrodes (sEEG), or high-density sEEG  
10 electrodes. As expected, for both SDE and sEEG electrodes, higher frequency signals  
11 exhibited a sharper fall off relative to lower frequency signals. For broadband high  
12 gamma (BHG) activity, the mean FWHM of SDEs ( $6.6 \pm 2.5$  mm) and sEEGs in gray  
13 matter ( $7.14 \pm 1.7$  mm) was not significantly different, however the FWHM for low  
14 frequencies recorded by sEEGs was 2.45 mm smaller than SDEs. White matter sEEG  
15 electrodes showed much lower power for frequencies 17 to 200 Hz ( $q < 0.01$ ) and a  
16 much broader decay ( $11.3 \pm 3.2$  mm) than gray matter electrodes ( $7.14 \pm 1.7$  mm).  
17 The use of a bipolar referencing scheme significantly lowered FWHM for sEEG  
18 electrodes, as compared with a white matter reference or a common average  
19 reference. These results outline the influence of array design, spectral bands, and  
20 referencing schema on local field potential recordings and source localization in icEEG  
21 recordings in humans. The metrics we derive have immediate relevance to the  
22 analysis and interpretation of both cognitive and epileptic data.

## 23 Introduction

24 Invasive neural recordings provide a unique window into human cognition. Over the  
25 last several decades, intracranial field potential recordings have yielded profound  
26 insights into a variety of neural systems including speech production (Cogan et al.  
27 2014; Pasley et al. 2012), auditory processing (Miller et al. 2021), language (Conner  
28 et al. 2019; Forseth et al. 2018), visual perception (Martin et al. 2019), motor control  
29 (Salari et al. 2019), decision making (Bartoli et al. 2018), emotion (Guillory and  
30 Bujarski 2014), and memory (Derner et al. 2018; Foster et al. 2012). An array of  
31 electrode designs and recording scales are now being implemented and ongoing  
32 progress in neuroengineering is yielding rapid advances in electrode design. The gap  
33 between what recording scale is technologically possible and that which is optimal for  
34 understanding the neurobiology of cognition, epilepsy or to provide inputs for brain  
35 machine interfaces, remains unknown (Marblestone et al. 2013; Pesaran et al. 2018).  
36 Answers to these questions, especially the optimal form factor required to resolve  
37 spatially distinct sources within the complex electric field landscape of the brain will  
38 influence the design of newer recording interfaces (Cybulski et al. 2015).

39  
40 The uncertainty of reconstructing the spatial and temporal sources based on multi-  
41 electrode field potentials - the inverse source problem (Herrerias 2016; Pesaran et al.  
42 2018) is a direct consequence of the imperfect resolution of recording electrodes and  
43 the source properties of the electric field landscape. While the complex geometry of  
44 single neurons makes the precise modeling of even one neuron's activity in isolation  
45 difficult to model (Nunez and Srinivasan 2005), the field potential at any recording  
46 electrode is an aggregate of quasi-synchronously active dipoles from a multitude of  
47 spatially distributed neural sources (Buzsáki et al. 2012; Łęski et al. 2013). Not all  
48 neurons contribute to this electric field landscape at any given instant, and different  
49 patterns of neural activity may generate similar field potential measures depending on  
50 the distance and the density of recording sites. The neural tissue that comprises this  
51 electric field landscape is itself heterogenous, with conductivity and dielectric  
52 constants that vary based on cell packing density and cortical location (Bingham et al.  
53 2020; Howell and McIntyre 2016; Nunez and Srinivasan 2005).

54  
55 At the resolution currently provided by macroelectrodes used for human intracranial  
56 electroencephalographic (icEEG) recordings, the measured field potential activity is  
57 not a direct measure of the activity of local cell assemblies, but rather a larger-scale  
58 measure of activity conducted through neural space. This volume conduction can lead  
59 to linear relationships between simultaneously recorded signals at neighboring  
60 electrodes, and it is hard to disentangle whether high levels of correlated activity  
61 between two electrodes are due to underlying neural dynamics (such as common input  
62 to both regions) or due to volume conduction of voltage from neighboring regions  
63 (Kellis et al. 2016). To resolve this, we define and quantify volume conduction as the  
64 instantaneous signal correlation at zero-time lag between electrode pairs, which  
65 quantifies common activity due to volume conduction. The lower the instantaneous  
66 correlation between electrodes, the lower the signal redundancy of each electrode's

67 listening zone and the greater its uniqueness. Determining the optimal spacing and  
68 location of electrodes to not only minimize signal redundancy, but to also capture  
69 separable field potential recordings is a pivotal hurdle for understanding and optimizing  
70 invasive field potential recordings in humans (Cybulski et al. 2015).

71  
72 To investigate the ability of multiple clinically used electrode types in resolving spatially  
73 distinct activity, we compared task-related cross-correlations in activity across  
74 subdural electrodes (SDE), stereo-electroencephalography electrodes (sEEG), and  
75 high-density sEEG (hdsEEG) electrodes in patients undergoing monitoring for the  
76 localization of medically intractable epilepsy. We analyzed the impact that referencing  
77 strategy, electrode location, and frequency components of the signal have on signal  
78 redundancy and the influence this could have on neural array design.

79

## 80 **Materials and Methods**

81 Participants: 71 patients (33 female, 18-65 years) participated in this research after  
82 providing written informed consent. All participants were semi-chronically implanted  
83 with intracranial electrodes for the localization of pharmaco-resistant epilepsy. All  
84 experimental procedures were reviewed and approved by the Committee for the  
85 Protection of Human Subjects (CPHS) of the University of Texas Health Science  
86 Center at Houston as Protocol Number HSC-MS-06-0385.

87

88 Electrode Implantation and Data Recording: Data were acquired from either subdural  
89 grid electrodes (SDEs; 18 patients), stereotactically placed depth electrodes (sEEGs;  
90 47 patients) or high-density depth electrodes (hdsEEGs; 6 patients) (Figure 1C,D).  
91 SDEs were subdural platinum-iridium electrodes embedded in a silicone elastomer  
92 sheet (PMT Corporation; top-hat design; 3mm diameter cortical contact), surgically  
93 implanted via a craniotomy (Conner et al. 2011; Pieters et al. 2013; Tandon 2012;  
94 Tong et al. 2020). sEEGs were implanted using a Robotic Surgical Assistant (ROSA;  
95 Medtech, Montpellier, France) (Rollo et al. 2020; Tandon et al. 2019). Each sEEG  
96 probe (PMT corporation, Chanhassen, Minnesota) was 0.8 mm in diameter and had  
97 8-16 electrode contacts. For the standard sEEG electrodes, each contact was a  
98 platinum-iridium cylinder, 2.0 mm in length and separated from the adjacent contact  
99 by 1.5 - 2.43 mm. Each patient had 12 - 20 sEEG probes implanted. For hdsEEG  
100 electrodes, contacts were 0.5 mm in length and separated from the adjacent contact  
101 by 0.5 mm. Each patient had 1 - 4 hdsEEG probes implanted. Following surgical  
102 implantation, electrodes were localized by co-registration of pre-operative anatomical  
103 3T MRI and post-operative CT scans in AFNI (Cox 1996). Electrode positions were  
104 projected onto a cortical surface model generated in FreeSurfer (Dale et al. 1999), and  
105 displayed on the cortical surface model for visualization (Pieters et al. 2013).  
106 Intracranial data were collected during research experiments starting on the first day  
107 after electrode implantation for sEEGs and two days after implantation for SDEs. Data  
108 were digitized at 2 kHz using the NeuroPort recording system (Blackrock  
109 Microsystems, Salt Lake City, Utah), imported into Matlab, initially referenced to the  
110 white matter electrode used as a reference for the clinical acquisition system and

111 visually inspected for line noise, artifacts and epileptic activity. Electrodes with  
112 excessive line noise or localized to sites of seizure onset were excluded. Trials  
113 contaminated by inter-ictal epileptic spikes were discarded.

114

115 Signal Analysis: Across all 75 patients, a total of 2,546 SDE, 8,493 sEEG, and 204  
116 hdsEEG electrode contacts were implanted. Of these, 704 SDE, 1,736 sEEG, and 51  
117 hdsEEG were excluded due to proximity to the seizure onset zone, frequent inter-ictal  
118 epileptiform spikes or line noise. The remaining electrodes included were: 1,842 SDE,  
119 6,757 sEEG, and 153 hdsEEG electrodes. Analyses were performed by bandpass  
120 filtering raw icEEG data from each electrode into 5 frequency bands (Theta, 4-8 Hz;  
121 Alpha, 8-15 Hz; Beta, 15-30 Hz; Narrowband Gamma, 30-60 Hz; Broadband High  
122 Gamma, 70-150 Hz). Following the removal of line noise (zero-phase 2<sup>nd</sup> order  
123 Butterworth band-stop filters), band-limited voltage traces were obtained (zero-phase  
124 3<sup>rd</sup> order Butterworth bandpass filters).

125

126 Referencing and Re-referencing strategy: During the recording session, a non-noisy  
127 clinical hardware reference electrode located in white matter was used as the  
128 reference electrode. For analysis, recordings were re-referenced using one of the  
129 following schemes (Figure 1B):

130 *Common average reference (CAR)*: Offline, raw data were visually inspected and  
131 electrodes exhibiting electrical noise or epileptiform artifacts were excluded from the  
132 common average. Neural data was then re-referenced to the average of all  
133 remaining electrodes that were included in this CAR.

134 *Low-Power CAR*: Broadband high gamma activity (70 – 150 Hz) was extracted for  
135 each time series (using the original clinical reference) using a frequency domain  
136 Hilbert transform and the percentage change in power was measured relative to a  
137 baseline time window of -500 to -100 ms before stimulus onset. If the percentage  
138 change in mean power was less than 20%, electrodes were included in the low-  
139 power CAR signal averaging.

140 *White Matter referencing*: We identified all sEEG and hdsEEG electrodes located in  
141 white matter, gray matter, and cerebrospinal fluid (CSF) based on their position  
142 relative to their FreeSurfer surfaces and included all white matter located electrodes.

143 *Bipolar referencing*: For the bipolar re-referencing, each electrode on the sEEG and  
144 hdsEEG probes was re-referenced to its closest neighboring non-noisy electrode  
145 located on the same probe. Electrodes on the end of the probe or whose nearest  
146 neighboring electrode was noisy were excluded from the analysis.

147

148 Experimental Design and Statistical Analyses:

149 *Experimental Task*: All patients participated in an auditory naming-to-definition task  
150 (Figure 1A) (Forseth et al. 2018), producing single word responses to an auditory  
151 presented definition. 70+ auditory stimuli (mean 87) were presented to each patient  
152 using stereo speakers (44.1 kHz, 15" MacBook Pro 2015) (Forseth et al. 2018). Stimuli  
153 had an average duration of  $1970 \pm 360$  ms, and an inter-stimulus interval of 5000 ms.

154 The time period of interest for this analysis was from 0 to 1000 ms following auditory  
155 stimulus onset.

156 *Full width at half-maximum (FWHM) measure:* To compare correlation between  
157 electrode pairs over distance, we calculated the full width at half maximum (FWHM)  
158 correlation. We first identified all non-noisy pairs of electrodes that were less than  
159 30mm from each other (in Euclidean distance). Pairwise Pearson's correlation was  
160 calculated between the band-limited voltage traces for all electrode pairs for each trial  
161 (Figure 1A). This correlation value was then averaged across all trials to return one  
162 correlation value for each electrode pair and frequency range. A decay function was  
163 fit to the absolute values of the correlations within each individual patient (Figure 1E).  
164 The decay function was defined as  $r = (1 - \beta)^d$ , where the correlation  $r$  decayed based  
165 on the decay factor  $\beta$  and the distance  $d$ . The decay factor was optimized using a  
166 least-squares fit. From this decay function, we extracted the distance at which the  
167 correlation equaled 0.5 - half the theoretical maximum correlation (half width at half  
168 maximum; HWHM). The HWHM value was doubled to generate the FWHM value for  
169 each condition (Figure 1E). For visualization purposes, the absolute values of these  
170 correlations for each patient were binned based on Euclidean distance into 2.5mm  
171 bins.

172 *Validation on Simulated Data:* Simulated timeseries data were created using the  
173 neural digital signal processing toolbox (Cole et al. 2019). 100 unique power law  
174 timeseries were generated in each of the 5 previously described frequency bands of  
175 interest with a power-law exponent of -2, a sampling frequency of 2,000 Hz, and a  
176 simulation time of 1.5 seconds to account for the removal of filtering edge effects. The  
177 Pearson's correlation coefficient was calculated between each pair of simulated  
178 signals to generate the actual correlation measurement. To calculate the  
179 reconstructed correlation dataset, timeseries from each frequency range were first  
180 combined to generate a summed electric field signal. Analyses were performed by  
181 bandpass filtering combined simulated data into the 5 previous described frequency  
182 bands using identical methods to the main analysis. Signals were randomly re-paired  
183 to create 75 simulated trials, approximately matching experimental conditions  
184 (Supplemental Figure 1).

185 *Power Spectral Density (PSD) Analysis:* Thomson's Slepian multitaper power  
186 spectral density (PSD) estimate of the signal was calculated. Significant differences  
187 between power in gray and white matter was calculated with Wilcoxon sign rank tests,  
188 corrected for multiple comparisons using a Benjamini-Hochberg false detection rate  
189 (FDR) threshold of  $q < 0.01$ .

190 *Linear Mixed Effects (LME) Modelling:* Linear mixed effects models were used to  
191 incorporate random and fixed-effects into a linear model. Fixed effects in our model  
192 were electrode type and frequency band. The random effect in our model was the  
193 participant. Electrode type was SDE, sEEG or hdsEEG. Data were assumed to be  
194 normal in distribution for statistical comparison.

195 *Data Visualization using Raincloud plots:* Raincloud plots, incorporating raw data  
196 points, probability density, and median, mean, confidence intervals, were utilized to

197 visualize data (Allen et al. 2019). Reported values for each category are median  $\pm$   
198 interquartile range.

199

## 200 Results

201 We utilized a correlation-based analysis to compute the falloff of cross-correlation as  
202 a function of distance, between pairs of all non-noisy electrodes regardless of cortical  
203 location. We constrained our analysis to task-related neural data, based on prior  
204 evidence that the spatial spread of correlated activity is lower during activity as  
205 opposed to rest (Muller et al. 2016). Importantly, our analyses compare differences in  
206 FWHM across referencing conditions, thereby preserving inter-electrode distance as  
207 a variable. By preserving inter-electrode distance in our FWHM measures, we  
208 effectively compute a local reduction in correlation, rather than a global reduction, as  
209 is captured in other distance-averaged correlation comparisons.

210

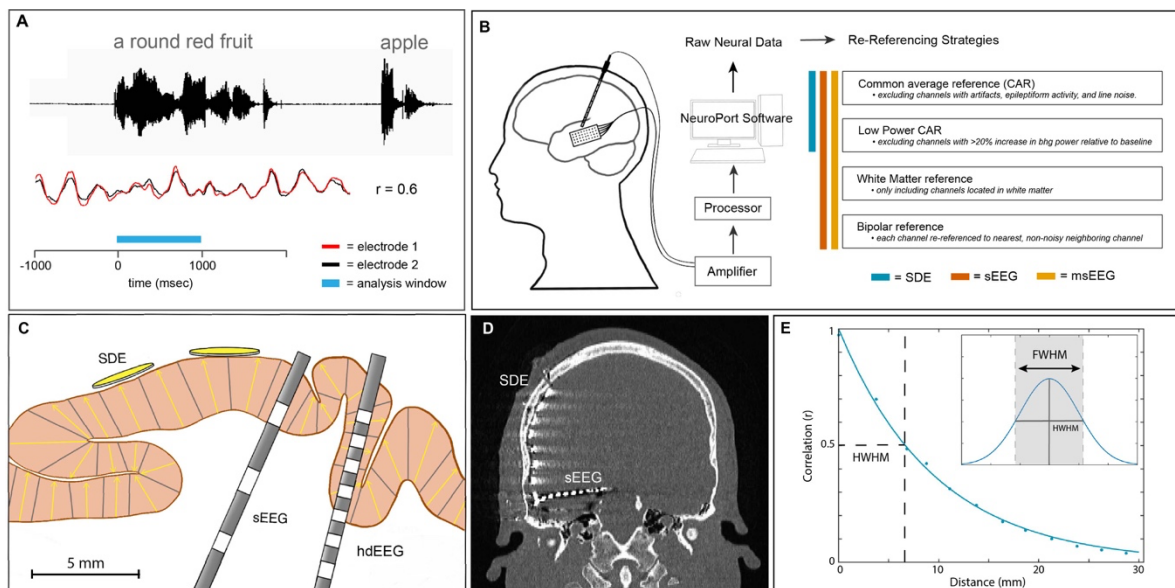

211

212

213 **Figure 1. Experimental Design.** (A) Schematic representation of the auditory naming to definition task.  
214 Colored bar indicates task-related analysis window (blue; 0 to 1000ms) during which cross-correlation  
215 ( $r$ ) is calculated between the waveforms of two exemplar neighboring electrodes (red and black;  
216 exemplar traces). (B) Schematic representation of the neural data acquisition and re-referencing  
217 strategies. (C) Schematic representation of the three electrode scales analyzed: subdural electrodes  
218 (SDE) 3 mm diameter disc, stereo-electroencephalography (sEEG) electrodes 2-mm long ring, and  
219 high-density sEEG (hdsEEG) electrodes 0.5-mm long ring. sEEG and hdsEEG contacts are depicted  
220 in grey. Yellow arrows depict dipole orientation within pictured cortical gray matter. (D) Representative  
221 computed tomography (CT) scan of a patient with concurrently implanted SDE and sEEG electrodes.  
222 (E) Example of full width at half maximum (FWHM) calculation. The correlation coefficient was  
223 measured using the raw voltage of every combination of electrode pairs within 30mm of each other, for  
224 each frequency range. Correlation values were fit with an exponential decay function. Half width at half  
225 maximum (HWHM) correlation was measured from this exponential decay function and doubled to  
226 generate the FWHM value for each condition.

227

228

229

230 **Effect of electrode scale and signal frequency on listening zone**

231 We first compared the decay function (indexed by the FWHM) for SDE vs sEEG  
232 electrodes in gray matter, to determine whether a subdural or intracortical location of  
233 the icEEG electrode significantly influences the listening zone (Figure 2). To compare  
234 differences in FWHM across frequency and electrode scale, we used a linear mixed  
235 effects (LME) model with fixed effects modeling frequency bands and electrode scale  
236 (SDE or sEEG). This model explained a large proportion of the variance of FWHM  
237 measures ( $r^2 = 0.65$ ). The electrode type had a significant effect on FWHM ( $t(321) = -$   
238  $4.5$ ,  $\beta = -2.4$ ,  $P < 0.001$ , 95% CI  $-3.5$  to  $-1.4$ ), which was 2.45 mm smaller for sEEG  
239 electrodes than for SDE electrode pairs, when comparing across all frequency ranges.  
240 The FWHM of the decay was smaller as frequency increased (LME:  $t(321) = -16.0$   $\beta$   
241  $= -1.8$ ,  $P < 0.001$ , 95% CI  $-2.0$  to  $-1.6$ ) and there was a significant interaction between  
242 frequency and electrode type ( $t(321) = 3.2$ ,  $\beta = -0.42$ ,  $P = 0.001$ , 95% CI  $0.17$  to  $0.68$ )  
243 indicating that the spatial extent of correlation is significantly dependent on frequency  
244 and electrode scale.

245  
246 For BHG alone, electrode type did not have a significant effect on FWHM ( $t(34) = 1.42$ ,  
247  $\beta = 1.07$ ,  $P = 0.17$ , 95% CI  $-0.5$  to  $2.6$ ). The mean FWHM in BHG for SDE electrodes  
248 ( $6.6 \pm 2.5$  mm) was slightly lower than for gray matter located sEEG electrodes ( $7.14$   
249  $\pm 1.7$  mm), however this difference was not significant.

250

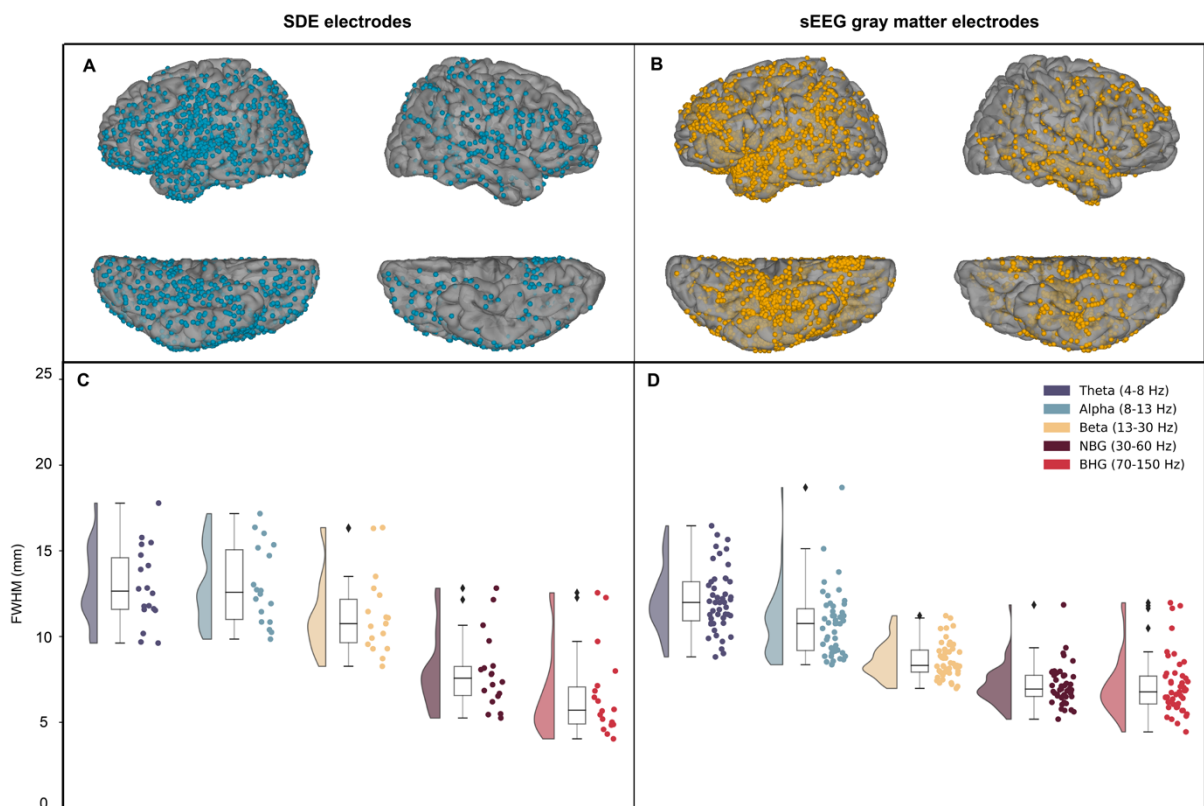

251

252 **Figure 2. Across-electrode differences in correlation over distance.** Coverage map of locations of  
253 SDE electrodes (A; 18 patients, 1,842 electrodes, 37,272 electrode pairs) and gray matter located  
254 sEEG electrodes (B; 47 patients, 2,916 electrodes, 47,522 electrode pairs). Average full width at half

255 maximum (FWHM) was calculated and plotted for each patient for SDE (C) and sEEG (D) electrode  
256 pairs. Abbreviations: narrowband gamma (NBG), broadband high gamma (BHG).

257

### 258 ***Location dependence of sEEG electrode listening zone***

259 SDEs sit on the cortical surface, proximal to local field generators, whereas many  
260 individual sEEG electrodes are located within white matter, distant from the cortical  
261 surface and measuring far field potentials. Thus, the physical location of sEEG  
262 electrodes could present potentially confounding correlation measures across  
263 distance. An LME model with fixed effects modeling frequency and electrode location  
264 (white matter or gray matter located sEEGs) explained a large proportion of the  
265 variance in FWHM measures ( $r^2 = 0.78$ ). sEEG electrodes located in gray matter had  
266 a much smaller FWHM (8.3 mm lower) compared to those located in white matter  
267 (LME:  $t(466) = -17.3$ ,  $\beta = -8.3$ ,  $P < 0.001$ , 95% CI -9.2 to -7.3) (Figure 3, Supplementary  
268 Figure 2). Additionally, the interaction between FWHM and frequency range  
269 significantly depended on electrode location ( $t(466) = 6.6$ ,  $\beta = 0.95$ ,  $P < 0.001$ , 95% CI  
270 0.67 to 1.2) with low frequencies showing a broader listening zone in white matter  
271 electrodes. For theta frequencies, the mean FWHM for sEEG electrodes located in  
272 white matter was  $20.2 \pm 4.3$  mm, whereas the mean FWHM for gray matter sEEG  
273 electrodes was  $12.1 \pm 1.8$  mm.

274

275 When comparing the effect of electrode location on BHG activity, an LME model with  
276 fixed effects modeling electrode location explained a large proportion of the variance  
277 of the FWHM measures ( $r^2 = 0.85$ ). For BHG frequencies, the mean FWHM for sEEG  
278 electrodes located in white matter was  $11.3 \pm 3.2$  mm, whereas the mean FWHM for  
279 sEEG electrodes located in gray matter was  $7.14 \pm 1.7$  mm. For the BHG band,  
280 electrode location did have a significant effect on FWHM of signal correlation decay  
281 ( $t(92) = -13.5$ ,  $\beta = -4.2$ ,  $P < 0.001$ , 95% CI -4.8 to -3.6). Of course, there is not much  
282 power in white matter recordings and these correlations may be higher given these  
283 lower amplitude signals. To assess this, we compared mean power spectral density  
284 (PSD) plots for sEEG electrodes located in white matter or gray matter, demonstrating  
285 the much lower power in white matter sEEG electrodes (for all frequencies 18 to 200  
286 Hz;  $q < 0.01$ ) (Supplementary Figure 3).

287



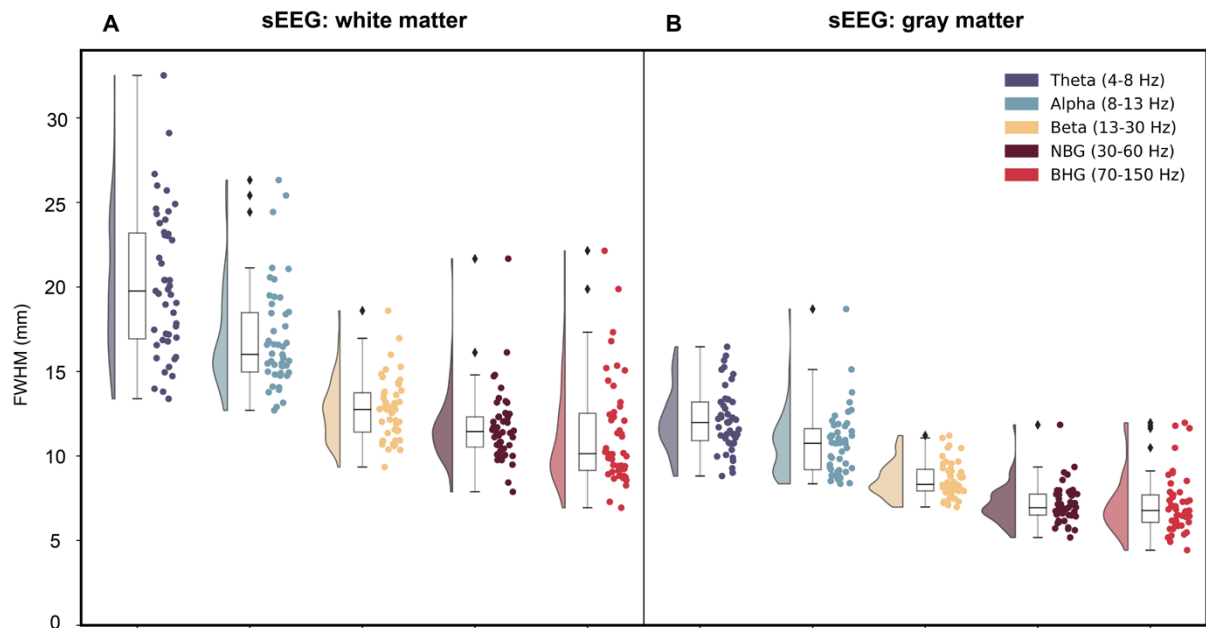

288  
289 **Figure 3. Anatomical location of sEEG contacts in gray or white matter significantly influences**  
290 **full width at half maximum (FWHM) correlation measures.** Raincloud plots depicting FWHM values  
291 for each patient in each frequency range for all pairs of white matter located (**A**; 2,649 electrodes;  
292 43,957 electrode pairs) and gray matter located (**B**; 2,916 electrodes; 47,522 electrode pairs) pairs.  
293 Abbreviations: narrowband gamma (NBG), broadband high gamma (BHG).

294

### 295 **Referencing strategies for SDE and sEEG electrodes**

296 Next, we examined the influence of referencing schemes on measured correlation.  
297 Based on evidence that referencing strategies can eliminate or increase spurious  
298 correlation between recording electrodes (Li et al. 2018), we compared several  
299 commonly used referencing schemes; common average reference (CAR), low-power  
300 CAR, white matter referencing, and bipolar referencing, across SDE and gray matter  
301 located sEEG electrode pairs (Figure 4).

302

303 A two-way ANOVA was conducted comparing effects of referencing scheme and  
304 frequency range on FWHM measures. For SDE electrode pairs, there was no  
305 significant interaction between the referencing scheme and the frequency band on  
306 FWHM measures ( $F(4,170) = 0.01$ ,  $P = 0.99$ ). There was a significant effect of  
307 frequency ( $F(4,170) = 57.96$ ,  $P < 0.001$ ) on FWHM, but no significant effect of  
308 referencing scheme ( $F(1,170) = 0.07$ ,  $P = 0.79$ ). For BHG activity, SDEs showed a  
309 correlation decay of  $6.6 \pm 2.5$  mm FWHM for the CAR scheme (Figure 4A), and  $6.6 \pm$   
310  $2.6$  mm FWHM for the low-power CAR scheme (Figure 4B). For BHG frequency  
311 specifically, a two-way ANOVA showed no significant effect of referencing scheme on  
312 FWHM for SDE electrodes ( $F(1,35) = 5.5 \times 10^{-5}$ ,  $P = 0.99$ ). For theta activity, SDEs  
313 showed a correlation decay of  $13.0 \pm 2.3$  mm FWHM for the CAR scheme (Figure 4A),  
314 and  $13.1 \pm 2.3$  mm FWHM for the low-power CAR scheme (Figure 4B).

315

316 For gray matter located sEEG electrode pairs, a two-way ANOVA showed a significant  
317 effect of referencing type ( $F(2,690) = 586.48$ ,  $P < 0.001$ ) and frequency ( $F(4,690) =$

318 207.83,  $P < 0.001$ ) on FWHM values. There was a significant interaction between  
319 frequency and referencing scheme on FWHM values ( $F(8,690) = 9.92$ ,  $P < 0.001$ ). For  
320 BHG activity, sEEGs showed a correlation decay of  $7.14 \pm 1.7$  mm FWHM for the CAR  
321 scheme (Figure 4C),  $7.62 \pm 1.8$  mm for the white matter referencing scheme (Figure  
322 4D), and  $3.83 \pm 0.45$  mm for the bipolar referencing scheme (Figure 4E). For BHG  
323 frequency specifically, a two-way ANOVA showed a significant effect of referencing  
324 scheme on FWHM for sEEG electrodes ( $F(2,140) = 94.4$ ,  $P < 0.001$ ). For theta activity,  
325 sEEGs showed a correlation decay of  $12.1 \pm 1.8$  mm FWHM for the CAR scheme  
326 (Figure 4C),  $14.4 \pm 3.8$  mm for the white matter referencing scheme (Figure 4D), and  
327  $7.19 \pm 1.6$  mm for the bipolar referencing scheme (Figure 4E).  
328

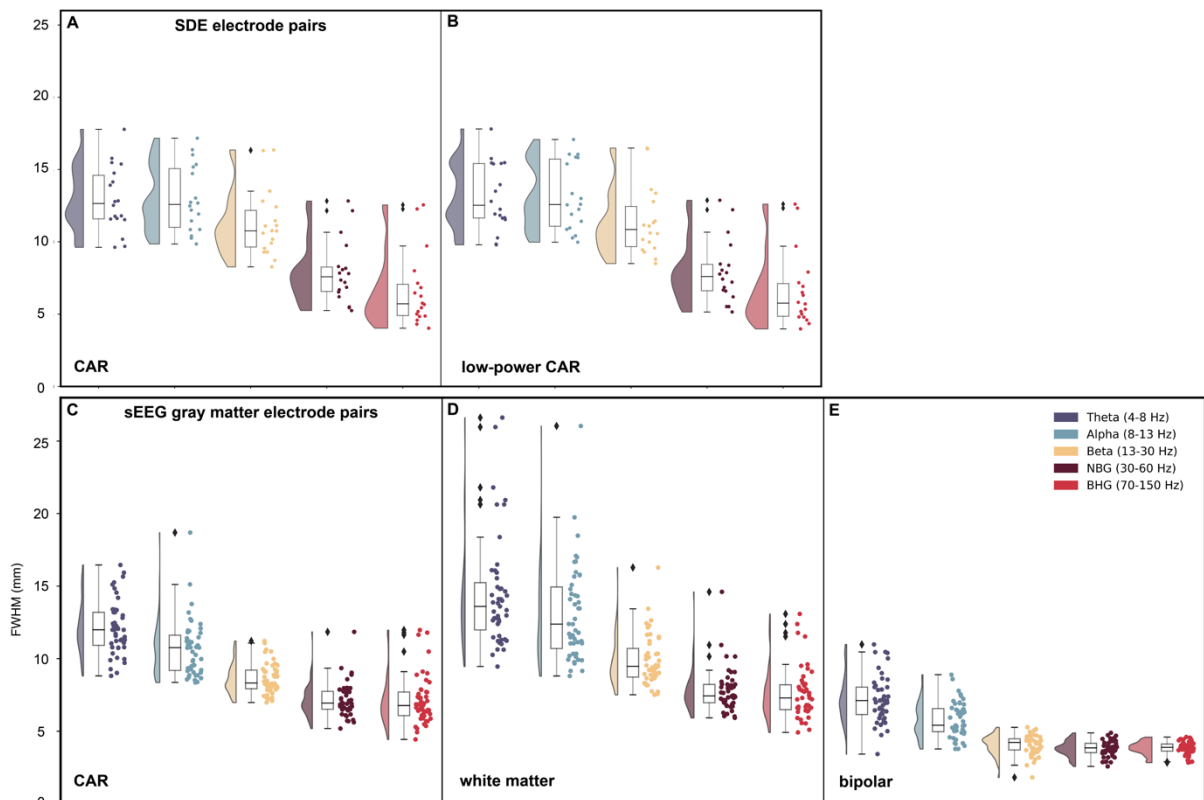

329  
330 **Figure 4. Referencing scheme comparison across SDEs and gray matter located sEEGs.** Average  
331 full width at half maximum (FWHM) was calculated and plotted for each patient for SDE (A-B;  $n = 18$   
332 patients) and sEEG (C-E;  $n = 47$  patients) electrode pairs in each frequency range of interest. For SDE  
333 electrode pairs (1,842 electrodes; 37,272 electrode pairs), average FWHM was compared using either  
334 common average reference (CAR) (A) or low-power CAR scheme (B). For gray matter located sEEG  
335 electrode pairs (2,916 electrodes; 47,522 electrode pairs), average FWHM was compared using either  
336 CAR (C), white matter (D), or bipolar referencing schemes (E). Abbreviations: narrowband gamma  
337 (NBG), broadband high gamma (BHG).  
338

### 339 **Listening zone of high-density sEEG (hdsEEG) electrodes**

340 The final group analysis compared pairwise correlation between hdsEEG electrodes  
341 (6 patients; 153 electrodes) across referencing scheme. These electrodes were  
342 cylinders of 0.5 mm length as compared to 2 mm contacts in standard sEEGs. (Figure  
343 5A). For broadband gamma activity, hdsEEG electrode pairs (CAR) had a mean

344 FWHM of  $6.5 \pm 1.4$  mm relative to the FWHM for gray matter located sEEG electrode  
345 pairs ( $7.14 \pm 1.7$  mm) and the SDE electrode pairs ( $6.6 \pm 2.5$  mm). For BHG frequency  
346 specifically, a two-way ANOVA showed no significant effect of referencing scheme on  
347 FWHM for hdsEEG electrodes ( $F(2,17) = 0$ ,  $P = 0.998$ ). For theta activity, hdsEEG  
348 electrode pairs (CAR) had a mean FWHM of  $17.3 \pm 6.7$  mm relative to FWHM for gray  
349 matter sEEG electrode pairs ( $12.1 \pm 1.8$  mm) and SDE electrode pairs ( $13.0 \pm 2.3$   
350 mm).

351

352 We compared CAR (Figure 5C), low-power CAR (Figure 5D), and white matter (Figure  
353 5E) referencing schemes for hdsEEG electrode pairs. A two-way ANOVA was  
354 conducted comparing effects of referencing scheme and frequency range on FWHM  
355 measures. There was no significant interaction between the effects of referencing  
356 scheme and frequency range on FWHM measures ( $F(8,75) = 0.04$ ,  $P = 1.0$ ). Higher  
357 frequencies had significantly lower FWHM than lower frequencies ( $F(4,75) = 19.59$ ,  $P$   
358  $< 0.001$ ), and referencing scheme had no effect on FWHM measures ( $F(2,75) = 0.11$ ,  
359  $P = 0.90$ ). The location of hdsEEG electrodes in white or gray matter had no significant  
360 effect on correlation over distance measures (Supplementary Figure 4).

361

362

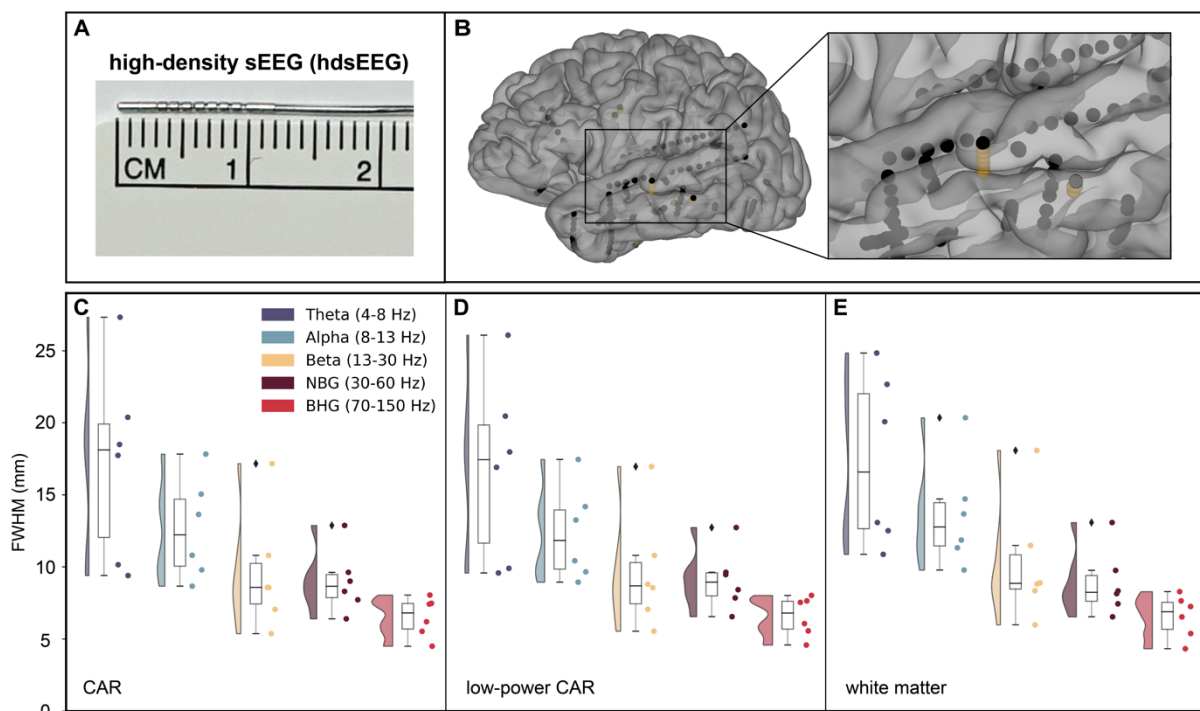

363

364 **Figure 5. Referencing scheme comparison across hdsEEG electrodes.** hdsEEG electrodes have  
365 0.5 mm in length electrodes (A) and an exemplar hdsEEG electrode implanted in one patient is shown  
366 in yellow (B). Average full width at half maximum (FWHM) was calculated and plotted for each patient  
367 for hdsEEG electrode pairs in each frequency range of interest. For hdsEEG electrode pairs (6 patients;  
368 153 electrodes; 1,967 electrode pairs), average FWHM was compared using either CAR (C), low-power  
369 CAR (D) or white matter referencing schemes (E). Abbreviations: narrowband gamma (NBG),  
370 broadband high gamma (BHG).

371

372

### 373 ***Methodological validation on simulated neural data***

374 To validate our analysis pipeline, we also analyzed simulated neural time series data  
375 (Cole et al. 2019) in the known correlation values between narrowband signals  
376 (Supplementary Figure 1). We found no significant differences between the actual  
377 correlations and those reconstructed after running the data through our analysis  
378 pipeline.

379

### 380 **Discussion**

381 We have systematically quantified the influence of electrode type, reference scheme  
382 and frequency band on the ability to dissociate sources at different scales in human  
383 icEEG recordings. Our work shows significant differences in the listening zone across  
384 electrode type and frequency band, with SDEs exhibiting the largest listening zone on  
385 average relative to sEEGs or hdsEEGs for low frequencies. When considering only  
386 high gamma activity, the listening zone was comparable across SDE and sEEG  
387 electrodes. The location of sEEG electrodes significantly influenced FWHM measures,  
388 with sEEG electrodes located in white matter exhibiting lower power and greater  
389 FWHM values than those located in gray matter. There is a significant interaction  
390 between spectral band and FWHM for all electrode types, with high frequency gamma  
391 signals exhibiting faster fall off of correlation over distance relative to lower frequency  
392 signals. Referencing schema only had a significant effect on FWHM measures for  
393 sEEG electrodes, with bipolar referencing generating significantly lower FWHM  
394 measures as compared with common average or white matter referencing.

395

### 396 **Influence of electrode type on FWHM measures**

397 The location of each electrode, whether atop the cortical surface (SDEs) or  
398 intracortically located (sEEGs) led to substantive differences in the listening zone of  
399 these electrodes. Across all frequencies, SDEs had broader spread of correlation over  
400 distance, with an average FWHM 2.45 mm greater than sEEGs, indicating a more  
401 local listening zone for sEEG electrodes. Importantly, the mean FWHM for broadband  
402 high gamma alone was not significantly different between SDE ( $6.6 \pm 2.5$  mm) and  
403 sEEGs ( $7.14 \pm 1.7$  mm), indicating a preserved locality of BHG across electrode scale.

404

405 The hdsEEG electrodes explored in this analysis are parts of hybrid probes along with  
406 traditional sEEG electrodes, and the junction between the conducting and non-  
407 conducting edges of the electrode are negligible, as the diameter of the probe is  
408 identical across type. While SDE, sEEG, and hdsEEG electrodes have roughly similar  
409 impedance, their spacing and location relative to the cortical sources varies  
410 significantly. hdsEEG electrode pairs had mean FWHM of  $6.5 \pm 1.4$  mm for BHG,  
411 exhibiting the most local listening zone for correlation over distance, albeit in a smaller  
412 patient cohort with less electrode pairs in each patient than the SDE and sEEG  
413 comparisons.

414

415 While there is no consensus on the effect that various recording electrodes have on  
416 potential distribution, an electrode's surface impedance, distance from the source, and  
417 source strength all affect source localization (Ellenrieder et al. 2021; Næss et al. 2021;  
418 Vermaas et al. 2020). In addition to the inverse problem, a physical factor confounding  
419 recorded signals is that electrodes act as capacitors, and their size and impedance  
420 (the degree of resistance and reactance with surrounding electric potentials) impacts  
421 the resolution of the data (Hnazaee et al. 2020; Moffitt and McIntyre 2005). Fitting with  
422 the literature, our analyses reveal differences in the listening zone across electrode  
423 types. The SDE, sEEG, and hdSEEG electrodes examined here all have varying  
424 electrode size, orientation, spacing, and cortical location, which introduces distinct  
425 physical differences in resolution, especially when considering activity in lower  
426 frequency ranges.

427

### 428 **Interaction between spectral band and FWHM measures**

429 When examining properties of volume conduction, we found a significant interaction  
430 with the spectral band of the filtered EEG signal. SDE electrode pairs exhibited a  
431 significant falloff in FWHM as frequency band of interest increased, with mean FWHM  
432 being  $13.0 \pm 2.3$  mm for the theta range, whereas mean FWHM for BHG was  $6.6 \pm 2.5$   
433 mm (Figure 2C). This increased FWHM for SDEs at lower frequencies is consistent  
434 with a larger spatial reach of lower frequency potential produced by more extensive  
435 neuronal generators, which likely induces common activity across a larger region of  
436 neural space than smaller generators of higher-frequency activity (Ellenrieder et al.  
437 2021). This difference in FWHM across frequency range was less robust in gray matter  
438 located sEEG electrode pairs, with FWHM being  $12.1 \pm 1.8$  mm for theta and  $7.14 \pm$   
439  $1.7$  mm for BHG range (Figure 2D). When comparing electrode location, white matter  
440 located sEEG electrodes did exhibit more frequency-varying falloff of spatial source  
441 over distance relative to gray matter located sEEG electrodes (Figure 3). Across  
442 electrode scale, high frequency gamma signals exhibited a faster fall off of correlation  
443 values across distance, consistent with a smaller spatial reach of a local, weaker, and  
444 less synchronous high frequency gamma signal (Dubey and Ray 2020; Ellenrieder et  
445 al. 2021; Łęski et al. 2013). This is concordant with synchronous low frequency activity  
446 engaging a larger neural substrate than more focal and transient high-frequency  
447 activity (Lachaux et al. 2012; Parvizi and Kastner 2018; Rouse et al. 2016; Torres et  
448 al. 2019). Interestingly, this fall off of correlation values at lower frequencies varied  
449 across electrode type. The mean FWHM for BHG for gray matter sEEG electrodes  
450 ( $7.14 \pm 1.7$  mm), SDE electrodes ( $6.6 \pm 2.5$  mm), and hdsEEG electrodes ( $6.5 \pm 1.4$   
451 mm) were close in value, whereas the mean FWHM for theta for hdsEEG electrodes  
452 ( $17.3 \pm 6.7$  mm) was greater than FWHM for SDEs ( $13.0 \pm 2.3$  mm) and gray matter  
453 sEEGs ( $12.1 \pm 1.8$  mm).

454

### 455 **sEEG electrode location in white or gray matter influences FWHM measures**

456 Within sEEG electrode pairs, signal redundancy between electrodes in gray matter  
457 was significantly decreased relative to their white matter located counterparts  
458 (Supplementary Figure 2). Signal attenuation is dependent on the conductivity ratio of

459 the medium (Rogers et al. 2020), and white matter is considered largely anisotropic  
460 (Nunez and Srinivasan 2005), especially at this scale of field potential recording  
461 (Howell and McIntyre 2016). As such, white matter has been found to reflect activity  
462 from distant gray matter signals as well as volume conduction from nearby gray matter,  
463 thus increasing the likelihood of spurious correlation with activity in adjacent or distant  
464 regions (Mercier et al. 2017). While average FWHM was significantly greater for white  
465 matter located sEEGs (BHG:  $11.3 \pm 3.2$  mm) than gray matter located sEEGs (BHG:  
466  $7.14 \pm 1.7$  mm), the average power of activity recorded at white matter located sEEG  
467 electrodes was significantly lower than gray matter located electrodes (Supplementary  
468 Figure 3). This is consistent with previous findings that electrodes located farther from  
469 gray matter signal generators record lower amplitude signals (Mercier et al. 2017;  
470 Young et al. 2019). As such, the current analyses comparing FWHM across electrode  
471 type, referencing scheme, and frequency spectra considered only gray matter located  
472 sEEG electrodes to avoid confounds in measures of correlation over distance due to  
473 signal attenuation.

474

#### 475 **Impact of referencing schema on FWHM measures**

476 Referencing schemes have an often-understated impact on signal detection, and how  
477 the data are referenced is a critical consideration in analyses of neural data (Li et al.  
478 2018). The process of referencing neural signals has been found to distort and  
479 artificially inflate neural activation, functional connectivity and other measures (Li et al.  
480 2018; Liu et al. 2015; Mercier et al. 2017). While measures of correlation should be  
481 scale-independent, the process of re-referencing likely influences correlation  
482 measures due to a decrease in distant noise, aiding in improved signal to noise ratio  
483 between nearby electrode pairs (Hnazaee et al. 2020). In our data, referencing  
484 scheme did not significantly influence FWHM measures for SDE or hdsEEG electrode  
485 pairs. However, for sEEG electrode pairs, we found a significant effect of referencing  
486 scheme on FWHM measures (Figure 4D,E). We found the choice of bipolar  
487 referencing scheme generates significantly lower FWHM measures between proximal  
488 sEEG electrode pairs, as compared with CAR and white matter referencing. These  
489 results corroborate previous findings (Li et al. 2018) comparing the effect of  
490 referencing method on Pearson's correlation values averaged across sEEG electrode  
491 pairs regardless of inter-electrode distance.

492

493 While common average referencing is commonly implemented in icEEG analyses,  
494 there are many considerations when implementing a bipolar referencing scheme (Li  
495 et al. 2018; Mercier et al. 2017). While bipolar referencing removes all signal common  
496 to neighboring electrodes, this does not take into account anatomical location or dipole  
497 orientation, which can distort source localization (Hu et al. 2010). Depending on the  
498 location and orientation of sEEG electrodes relative to sulci and sources, bipolar  
499 referencing could have quite a variable effect on signal detection. Additionally, it is  
500 common when analyzing icEEG datasets to combine activity recorded via SDE and  
501 sEEG electrodes. In this case, the question of how to implement bipolar referencing in  
502 SDE electrodes becomes geometrically complex. As such, the FWHM for sEEG

503 electrode pairs under the CAR scheme is found to reflect a very local listening zone  
504 ( $7.14 \pm 1.7$  mm), and these data suggest referencing scheme is a critical consideration  
505 in ensuring common noise to all electrodes is eliminated and does not confound further  
506 analysis.

507

### 508 **Comparison with previous studies**

509 From neuroscientific research to the continuing development of brain-computer  
510 interfaces, decoding neural activity remains a necessary and complex goal. As neural  
511 interfaces continue to develop and our ability to record electrical activity from the brain  
512 at smaller scales advances, the overlap between what is feasible and what is  
513 informative remains unclear. A pivotal question of optimizing coverage, recording  
514 scale, or inter-electrode distance when designing neural interfaces remains a critical  
515 constraint. Thus, optimal balance between electrode type, size, and spacing of  
516 contacts will improve comprehensive mapping of cortical activity while minimizing  
517 redundancy of information.

518

519 Determining the optimal spacing and location of electrodes to not only minimize signal  
520 redundancy, but to also capture separable field potential recordings represents a  
521 pivotal hurdle for invasive field potential recordings in humans (Cybulski et al. 2015).  
522 There is currently no consensus in how to best allocate activity recorded by various  
523 electrode types to regions of nearby cortical space. In the absence of a solution to this  
524 problem, various methods are used to estimate the spatial extent of the neural  
525 population contributing to activity recorded at an individual electrode. The current  
526 methodologies implemented rely on assumptions and in vivo measurements to model  
527 the dielectric, conductive, and anisotropic aspects of neural tissue (Howell and  
528 McIntyre 2016, 2017; Miceli et al. 2017). These include spatial discrimination  
529 techniques (Herreras 2016), surface-based estimates of the recording zone  
530 (Kadipasaoglu et al. 2015) and weighting functions based on electrode properties of  
531 size, layout, and impedance (Dubey and Ray 2019). Computational models  
532 incorporating heterogeneity and anisotropy have been found to more accurately  
533 reconstruct neural response to stimulation in DBS application (Åström et al. 2012;  
534 Howell and McIntyre 2017).

535

536 In non-human primates, concurrent comparison of field potential recordings with  
537 single-unit (Dubey and Ray 2019) and multi-unit (Xing et al. 2009) resolution reveals  
538 the estimated spatial spread of cortical field potential recordings using intracranial  
539 microelectrodes (1 mm long; 400  $\mu$ m pitch) to be local (roughly 3 mm) (Dubey and  
540 Ray 2020). In contrast, the location and design of neural probes in humans are  
541 largely limited to clinical application, making confident parameterization difficult.  
542 Despite these limitations, previous research has compared recording scale in  
543 humans (Halgren et al. 2018; Kellis et al. 2016; Lai et al. 2018; Muller et al. 2016;  
544 Trumpis et al. 2021) in order to disambiguate the uncertain properties of neural  
545 activity captured by different electrodes.

546

547 Modern icEEG recordings incorporate data from varying recording scales, cortical  
548 locations, referencing strategies, and analysis approaches. There is a wealth of  
549 existing data that has been gathered with a variety of tools and methodologies; the  
550 question becomes, how can findings be integrated across this diversity of scales?  
551 Beyond human neuroscience, how can direct comparisons be made with data  
552 collected from non-human primates? While icEEG recordings provide unique and  
553 robust high spatial and temporal resolution neural data, there are such disparate  
554 values of the spatial extent of LFP values reported in the literature (Kajikawa and  
555 Schroeder 2011; Kellis et al. 2016).

556

### 557 **Conclusions**

558 Our results implicate electrode spacing, location, referencing strategy, and spectral  
559 band to be pivotal considerations in the minimization of signal redundancy and other  
560 confounds influencing the clarity of field potential analyses. We explored these  
561 confounds in a large robust dataset to probe these intrinsic uncertainties of field  
562 potential recordings. As with all aspects of scientific research, it is only through  
563 understanding the limitations of the tools we have to observe neural phenomenon that  
564 we can optimize the strengths, and get closer to understanding complex aspects of  
565 human cognition.

566

567

### 568 **Acknowledgements**

569 We express our gratitude to all the patients who participated in this study; the  
570 neurologists at the Texas Comprehensive Epilepsy Program who participated in the  
571 care of these patients; and the nurses and technicians in the Epilepsy Monitoring Unit  
572 at Memorial Hermann Hospital who helped make this research possible. This work  
573 was supported by the NIH U01 N5098981, NIH/NIDCD DC014589, and the University  
574 of Texas System funding for the Texas Institute for Restorative Neurotechnologies.

575

### 576 **Declaration of Interests**

577 The authors declare no competing interests.



578 **References**

579

- 580 Allen M, Poggiali D, Whitaker K, Marshall TR, Kievit RA. Raincloud plots: a multi-platform  
581 tool for robust data visualization. *Wellcome Open Res* 4: 63, 2019.
- 582 Åström M, Lemaire J-J, Wårdell K. Influence of heterogeneous and anisotropic tissue  
583 conductivity on electric field distribution in deep brain stimulation. *Med Biol Eng Comput* 50:  
584 23–32, 2012.
- 585 Bartoli E, Conner CR, Kadipasaoglu CM, Yellapantula S, Rollo MJ, Carter CS, Tandon N.  
586 Temporal Dynamics of Human Frontal and Cingulate Neural Activity During Conflict and  
587 Cognitive Control. *Cereb Cortex New York N Y 1991* 28: 3842–3856, 2018.
- 588 Bingham CS, Paknahad J, Girard CBC, Loizos K, Bouteiller J-MC, Song D, Lazzi G, Berger  
589 TW. Admittance Method for Estimating Local Field Potentials Generated in a Multi-Scale  
590 Neuron Model of the Hippocampus. *Front Comput Neurosc* 14: 72, 2020.
- 591 Buzsáki G, Anastassiou CA, Koch C. The origin of extracellular fields and currents — EEG,  
592 ECoG, LFP and spikes. *Nat Rev Neurosci* 13: 407–420, 2012.
- 593 Cogan GB, Thesen T, Carlson C, Doyle W, Devinsky O, Pesaran B. Sensory–motor  
594 transformations for speech occur bilaterally. *Nature* 507: 94–98, 2014.
- 595 Cole S, Donoghue T, Gao R, Voytek B. NeuroDSP: A package for neural digital signal  
596 processing. *J Open Source Softw* 4: 1272, 2019.
- 597 Conner CR, Ellmore TM, DiSano MA, Pieters TA, Potter AW, Tandon N. Anatomic and  
598 electro-physiologic connectivity of the language system: a combined DTI-CCEP study.  
599 *Comput Biol Med* 41: 1100–9, 2011.
- 600 Conner CR, Kadipasaoglu CM, Shouval HZ, Hickok G, Tandon N. Network dynamics of  
601 Broca’s area during word selection. *Plos One* 14: e0225756, 2019.
- 602 Cox RW. AFNI: Software for Analysis and Visualization of Functional Magnetic Resonance  
603 Neuroimages. *Comput Biomed Res* 29: 162–173, 1996.
- 604 Cybulski TR, Glaser JI, Marblestone AH, Zamft BM, Boyden ES, Church GM, Kording KP.  
605 Spatial information in large-scale neural recordings. *Front Comput Neurosc* 8: 172, 2015.
- 606 Dale AM, Fischl B, Sereno MI. Cortical Surface-Based Analysis I. Segmentation and Surface  
607 Reconstruction. *Neuroimage* 9: 179–194, 1999.
- 608 Derner M, Chaieb L, Surges R, Staresina BP, Fell J. Modulation of Item and Source Memory  
609 by Auditory Beat Stimulation: A Pilot Study With Intracranial EEG. *Front Hum Neurosci* 12:  
610 500, 2018.
- 611 Dubey A, Ray S. Cortical Electro-corticogram (ECoG) Is a Local Signal. *J Neurosci* 39: 4299–  
612 4311, 2019.
- 613 Dubey A, Ray S. Comparison of tuning properties of gamma and high-gamma power in local  
614 field potential (LFP) versus electrocorticogram (ECoG) in visual cortex. *Sci Rep-uk* 10: 5422,  
615 2020.

- 616 Ellenrieder N von, Khoo HM, Dubeau F, Gotman J. What do intracerebral electrodes  
617 measure? *Clin Neurophysiol* 132: 1105–1115, 2021.
- 618 Forseth KJ, Kadipasaoglu CM, Conner CR, Hickok G, Knight RT, Tandon N. A lexical  
619 semantic hub for heteromodal naming in middle fusiform gyrus. *Brain J Neurology* 141:  
620 2112–2126, 2018.
- 621 Foster BL, Dastjerdi M, Parvizi J. Neural populations in human posteromedial cortex display  
622 opposing responses during memory and numerical processing. *Proc National Acad Sci* 109:  
623 15514–15519, 2012.
- 624 Guillory SA, Bujarski KA. Exploring emotions using invasive methods: review of 60 years of  
625 human intracranial electrophysiology. *Soc Cogn Affect Neur* 9: 1880–1889, 2014.
- 626 Halgren M, Fabó D, Ulbert I, Madsen JR, Eröss L, Doyle WK, Devinsky O, Schomer D, Cash  
627 SS, Halgren E. Superficial Slow Rhythms Integrate Cortical Processing in Humans. *Sci Rep-  
628 uk* 8: 2055, 2018.
- 629 Herreras O. Local Field Potentials: Myths and Misunderstandings. *Front Neural Circuit* 10:  
630 101, 2016.
- 631 Hnazaee MF, Wittevrongel B, Khachatryan E, Libert A, Carrette E, Dauwe I, Meurs A, Boon  
632 P, Roost DV, Hulle MMV. Localization of deep brain activity with scalp and subdural EEG.  
633 *Neuroimage* 117344, 2020.
- 634 Howell B, McIntyre CC. Analyzing the tradeoff between electrical complexity and accuracy in  
635 patient-specific computational models of deep brain stimulation. *J Neural Eng* 13: 036023,  
636 2016.
- 637 Howell B, McIntyre CC. Role of Soft-Tissue Heterogeneity in Computational Models of Deep  
638 Brain Stimulation. *Brain Stimul* 10: 46–50, 2017.
- 639 Hu S, Stead M, Dai Q, Worrell GA. On the Recording Reference Contribution to EEG  
640 Correlation, Phase Synchrony, and Coherence. *Ieee Transactions Syst Man Cybern Part B  
641 Cybern* 40: 1294–1304, 2010.
- 642 Kadipasaoglu CM, Forseth K, Whaley M, Conner CR, Rollo MJ, Baboyan VG, Tandon N.  
643 Development of grouped icEEG for the study of cognitive processing. *Front Psychol* 6: 1008,  
644 2015.
- 645 Kajikawa Y, Schroeder CE. How Local Is the Local Field Potential? *Neuron* 72: 847–858,  
646 2011.
- 647 Kellis S, Sorensen L, Darvas F, Sayres C, O'Neill K, Brown RB, House P, Ojemann J,  
648 Greger B. Multi-scale analysis of neural activity in humans: Implications for micro-scale  
649 electrocorticography. *Clin Neurophysiol* 127: 591–601, 2016.
- 650 Lachaux J-P, Axmacher N, Mormann F, Halgren E, Crone NE. High-frequency neural activity  
651 and human cognition: Past, present and possible future of intracranial EEG research. *Prog  
652 Neurobiol* 98: 279–301, 2012.
- 653 Lai M, Demuru M, Hillebrand A, Fraschini M. A comparison between scalp- and source-  
654 reconstructed EEG networks. *Sci Rep-uk* 8: 12269, 2018.

- 655 Łęski S, Lindén H, Tetzlaff T, Pettersen KH, Einevoll GT. Frequency Dependence of Signal  
656 Power and Spatial Reach of the Local Field Potential. *Plos Comput Biol* 9: e1003137, 2013.
- 657 Li G, Jiang S, Paraskevopoulou SE, Wang M, Xu Y, Wu Z, Chen L, Zhang D, Schalk G.  
658 Optimal referencing for stereo-electroencephalographic (SEEG) recordings. *NeuroImage*  
659 183: 327–335, 2018.
- 660 Liu Y, Coon WG, Pesterev A de, Brunner P, Schalk G. The effects of spatial filtering and  
661 artifacts on electrocorticographic signals. *J Neural Eng* 12: 056008, 2015.
- 662 Marblestone AH, Zamft BM, Maguire YG, Shapiro MG, Cybulski TR, Glaser JI, Amodei D,  
663 Stranges PB, Kalhor R, Dalrymple DA, Seo D, Alon E, Maharbiz MM, Carmena JM, Rabaey  
664 JM, Boyden ES, Church GM, Kording KP. Physical principles for scalable neural recording.  
665 *Front Comput Neurosci* 7: 137, 2013.
- 666 Martin AB, Yang X, Saalman YB, Wang L, Shestyuk A, Lin JJ, Parvizi J, Knight RT, Kastner  
667 S. Temporal Dynamics and Response Modulation across the Human Visual System in a  
668 Spatial Attention Task: An ECoG Study. *J Neurosci* 39: 333–352, 2019.
- 669 Mercier MR, Bickel S, Megevand P, Groppe DM, Schroeder CE, Mehta AD, Lado FA.  
670 Evaluation of cortical local field potential diffusion in stereotactic electro-encephalography  
671 recordings: A glimpse on white matter signal. *NeuroImage* 147: 219–232, 2017.
- 672 Miceli S, Ness TV, Einevoll GT, Schubert D. Impedance Spectrum in Cortical Tissue:  
673 Implications for Propagation of LFP Signals on the Microscopic Level. *Eneuro* 4:  
674 ENEURO.0291-16.2016, 2017.
- 675 Miller CA, Behroozmand R, Etler CP, Nourski KV, Reale RA, Oya H, Kawasaki H, Greenlee  
676 JDW. Neural correlates of vocal auditory feedback processing: Unique insights from  
677 electrocorticography recordings in a human cochlear implant user. *Eneuro* 8:  
678 ENEURO.0181-20.2020, 2021.
- 679 Muller L, Hamilton LS, Edwards E, Bouchard KE, Chang EF. Spatial resolution dependence  
680 on spectral frequency in human speech cortex electrocorticography. *J Neural Eng* 13:  
681 056013, 2016.
- 682 Nunez PL, Srinivasan R. Electric Fields of the Brain. The Neurophysics of EEG. second.  
683 Oxford University Press, 2005.
- 684 Parvizi J, Kastner S. Promises and limitations of human intracranial electroencephalography.  
685 *Nat Neurosci* 21: 474–483, 2018.
- 686 Pasley BN, David SV, Mesgarani N, Flinker A, Shamma SA, Crone NE, Knight RT, Chang  
687 EF. Reconstructing Speech from Human Auditory Cortex. *Plos Biol* 10: e1001251, 2012.
- 688 Pesaran B, Vinck M, Einevoll GT, Sirota A, Fries P, Siegel M, Truccolo W, Schroeder CE,  
689 Srinivasan R. Investigating large-scale brain dynamics using field potential recordings:  
690 analysis and interpretation. *Nat Neurosci* 21: 903–919, 2018.
- 691 Pieters TA, Conner CR, Tandon N. Recursive grid partitioning on a cortical surface model:  
692 an optimized technique for the localization of implanted subdural electrodes: Clinical article.  
693 *J Neurosurg* 118: 1086–1097, 2013.

- 694 Rogers N, Thunemann M, Devor A, Gilja V. Impact of Brain Surface Boundary Conditions on  
695 Electrophysiology and Implications for Electrocorticography. *Front Neurosci-switz* 14: 763,  
696 2020.
- 697 Rollo PS, Rollo MJ, Zhu P, Woolnough O, Tandon N. Oblique trajectory angles in robotic  
698 stereo-electroencephalography. *J Neurosurg* 1–10, 2020.
- 699 Rouse AG, Williams JJ, Wheeler JJ, Moran DW. Spatial co-adaptation of cortical control  
700 columns in a micro-ECoG brain–computer interface. *J Neural Eng* 13: 056018, 2016.
- 701 Salari E, Freudenburg ZV, Branco MP, Aarnoutse EJ, Vansteensel MJ, Ramsey NF.  
702 Classification of Articulator Movements and Movement Direction from Sensorimotor Cortex  
703 Activity. *Sci Rep-uk* 9: 14165, 2019.
- 704 Tandon N. Mapping of human language. In: *Clinical Brain Mapping*, edited by Yoshor D,  
705 Mizrahi E. McGraw Hill Education, 2012, p. 203–218.
- 706 Tandon N, Tong BA, Friedman ER, Johnson JA, Allmen GV, Thomas MS, Hope OA,  
707 Kalamangalam GP, Slater JD, Thompson SA. Analysis of Morbidity and Outcomes  
708 Associated With Use of Subdural Grids vs Stereoelectroencephalography in Patients With  
709 Intractable Epilepsy. *Jama Neurol* 76: 672–681, 2019.
- 710 Tong BA, Esquenazi Y, Johnson J, Zhu P, Tandon N. The Brain is Not Flat: Conformal  
711 Electrode Arrays Diminish Complications of Subdural Electrode Implantation, A Series of  
712 117 Cases. *World Neurosurg* 144: e734–e742, 2020.
- 713 Torres D, Makarova J, Ortuño T, Benito N, Makarov VA, Herreras O. Local and Volume-  
714 Conducted Contributions to Cortical Field Potentials. *Cereb Cortex* 29: 5234–5254, 2019.
- 715 Trumpis M, Chiang C-H, Orsborn AL, Bent B, Li J, Rogers JA, Pesaran B, Cogan G, Viventi  
716 J. Sufficient sampling for kriging prediction of cortical potential in rat, monkey, and human  
717 ECoG. *J Neural Eng* 18: 036011, 2021.
- 718 Xing D, Yeh C-I, Shapley RM. Spatial Spread of the Local Field Potential and its Laminar  
719 Variation in Visual Cortex. *J Neurosci* 29: 11540–11549, 2009.
- 720 Young JJ, Friedman JS, Panov F, Camara D, Yoo JY, Fields MC, Marcuse LV, Jette N,  
721 Ghatan S. Quantitative Signal Characteristics of Electrocorticography and  
722 Stereoelectroencephalography: The Effect of Contact Depth. *J Clin Neurophysiol* 36: 195–  
723 203, 2019.
- 724

725 **Supplemental Figures**

726

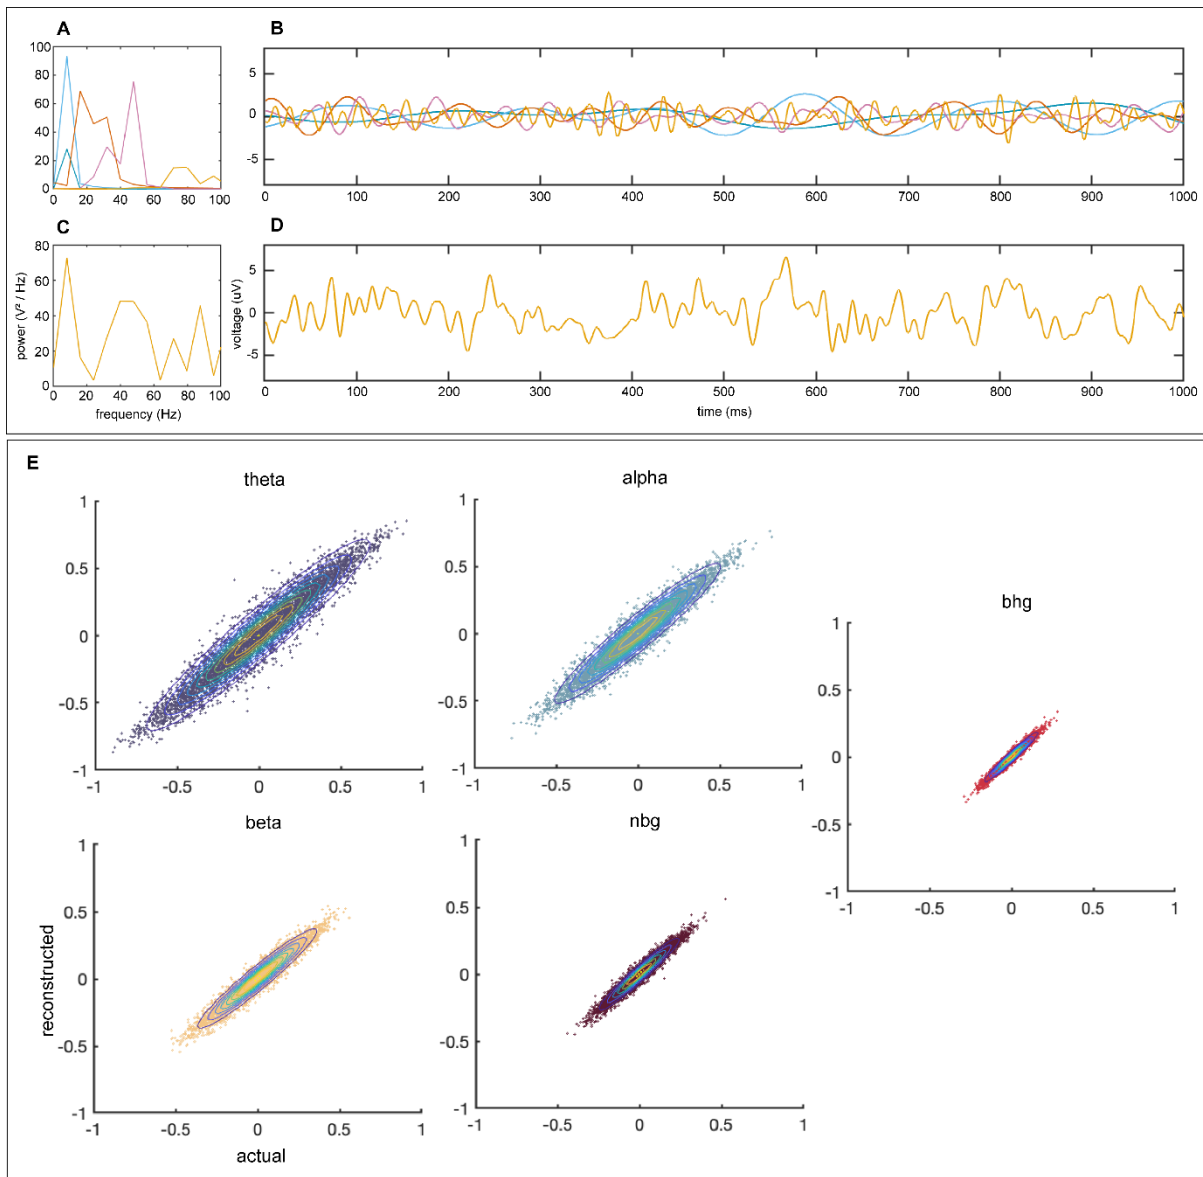

727

728

729

730

731

732

733

734

735

736

737

738

Supplemental Figure 1. **Correlation analysis on simulated timeseries data reveals no spurious correlation due to the analytic pipeline.** Representative spectral power (A) and timeseries (B) of simulated neural data in each frequency range of interest (Theta, 4-8 Hz; Alpha, 8-15 Hz; Beta, 15-30 Hz; Narrowband Gamma, 30-60 Hz; Broadband High Gamma, 70-150 Hz). Representative power spectrum (C) and timeseries (D) of electric field signal comprised of summed timeseries in each frequency shown in (B). Comparison of actual and reconstructed Pearson's correlation coefficient (r) between every combination of simulated timeseries (E) overlaid with 2D probability density estimation reveal no significant difference between actual and reconstructed correlation values on simulated data.

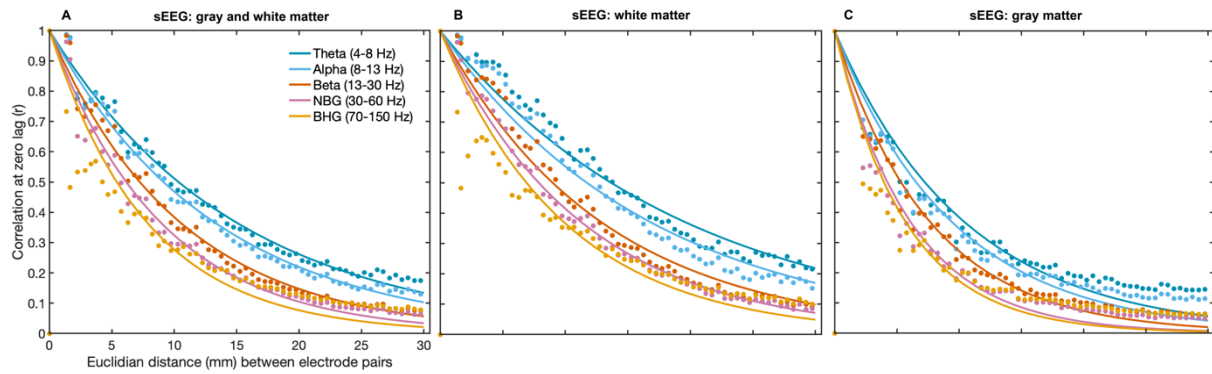

739

740

741 **Supplementary Figure 2. Anatomical location of sEEG contacts in gray or white matter**

742 **significantly influences correlation measures over distance.** Pearson's correlation coefficient was

743 measured between pairs of sEEG electrodes located in gray and white matter (**A**; 47 patients; 6,757

744 electrodes; 244,621 electrode pairs), white matter only (**B**; 2,649 electrodes; 43,957 electrode pairs),

745 or gray matter only (**C**; 2,916 electrodes; 47,522 electrode pairs). Each data point is binned into 0.5 mm

746 bins based on distance between electrode pairs, colored based on frequency range of interest and fit

747 with an exponential decay function shown as colored solid lines. Abbreviations: narrowband gamma

748 (NBG), broadband high gamma (BHG).

749

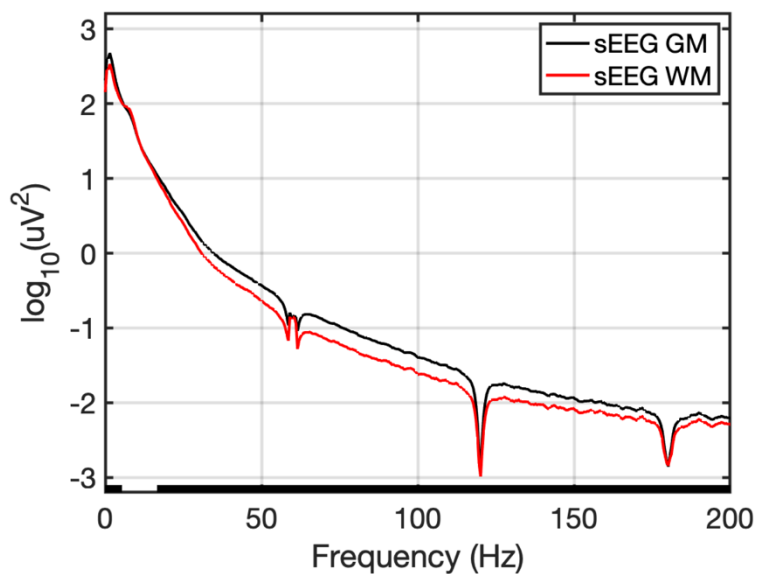

750

751

752 **Supplementary Figure 3. Mean power over frequency for sEEG electrodes based on location in**

753 **gray or white matter.** Mean power spectral density (PSD) plots for sEEG electrodes located in white

754 matter (WM; red; 2,649 electrodes) or gray matter (GM; black; 2,916 electrodes). Notch filters were

755 applied at 60 Hz and harmonics. Results from Wilcoxon sign rank test with significance threshold of

756 <0.01 denoted by black bar along the x axis.

757

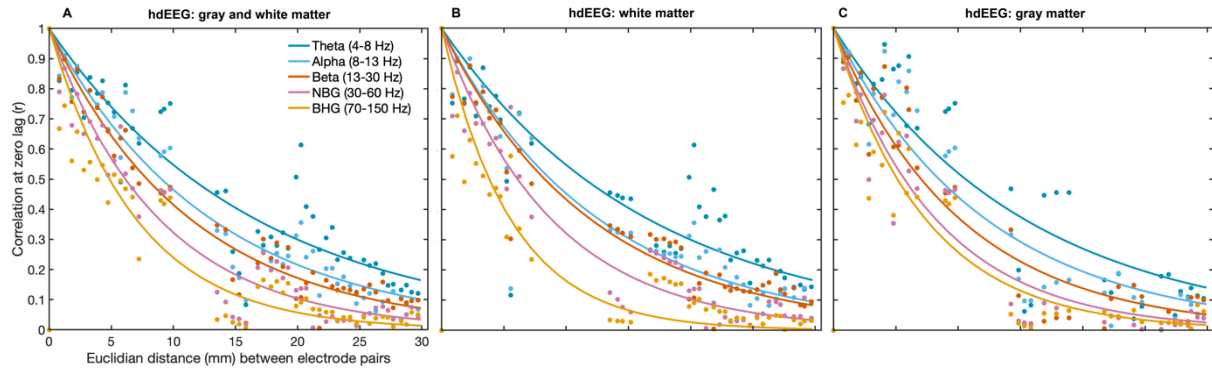

758  
759

760 **Supplementary Figure 4. Impact of anatomical location of high-density sEEG (hdsEEG) electrodes**  
761 **on correlation measures over distance.** Pearson's correlation coefficient was measured between  
762 pairs of hdsEEG electrodes located in gray and white matter (**A**; 6 patients; 153 electrodes; 1,967  
763 electrode pairs), white matter only (**B**; 53 electrodes; 421 electrode pairs), or gray matter only (**C**; 59  
764 electrodes; 347 electrode pairs). Each data point is the correlation values for each patient binned into  
765 0.5 mm bins based on distance between electrode pairs, colored based on frequency range of interest  
766 and fit with an exponential decay function shown as colored solid lines. Abbreviations: narrowband  
767 gamma (NBG), broadband high gamma (BHG).
